# Supplementary material
Source: publisher site journal article supplement (https://www.dovepress.com/article/241588)
Supplement: Supplementary file 1 [file get_supplementary_file.php]

# Supplementary Material

**Table S1: ICD codes for RHD**

| I05 | Rheumatic mitral valve diseases |
| --- | --- |
| I05.1 | Rheumatic mitral insufficiency |
| I05.2 | Mitral stenosis with insufficiency |
| I05.8 | Other mitral valve diseases |
| I05.9 | Mitral valve disease, unspecified |
| I06 | Rheumatic aortic valve diseases |
| I06.1 | Rheumatic aortic insufficiency |
| I06.2 | Rheumatic aortic stenosis with insufficiency |
| I06.8 | Other rheumatic aortic valve diseases |
| I06.9 | Rheumatic aortic valve disease, unspecified |
| I07 | Rheumatic tricuspid valve diseases |
| I07.1 | Tricuspid insufficiency |
| I07.2 | Tricuspid stenosis with insufficiency |
| I07.8 | Other tricuspid valve diseases |
| I07.9 | Tricuspid valve disease, unspecified |
| I08 | Multiple valve diseases |
| I08.0 | Disorders of both mitral and aortic valves |
| I08.1 | Disorders of both mitral and tricuspid valves |
| I08.2 | Disorders of both aortic and tricuspid valves |
| I08.3 | Combined disorders of mitral, aortic and tricuspid valves |
| I08.8 | Other multiple valve diseases |
| I08.9 | Multiple valve disease, unspecified |
| I09 | Other rheumatic heart diseases |
| I09.1 | Rheumatic diseases of endocardium, valve unspecified |
| I09.2 | Chronic rheumatic pericarditis |
| I09.8 | Other specified rheumatic heart diseases |
| I09.9 | Rheumatic heart disease, unspecified |

**Table S2:** **Sources of case validation for RHD cases and non-cases, by hospital admissions and persons, n (%)**

|  | ARF/RHD register data | WA file audit data | Surgical data | Total |
| --- | --- | --- | --- | --- |
| Admissions (total) | 723 (62.3%) | 362 (31.2%) | 85 (7.3%) | 1160 |
| Admissions (RHD cases) | 687 (70.0%) | 219 (22.3%) | 84 (8.6%) | 981 |
| Admissions (RHD non-cases) | 36 (20.1%) | 143 (79.9%) | 0 (0.0%) | 179 |
| Persons (total) | 237 (45.4%) | 231 (44.3%) | 63 (12.1%) | 522 |
| Persons (RHD cases) | 205 (50.0%) | 150 (36.6%) | 63 (15.4%) | 410 |
| Persons (RHD non-cases) | 33 (28.9%) | 81 (71.1%) | 0 (0.0%) | 114 |

Notes: Absolute numbers do not add up to 100%, since records are counted separately for every data source where the source-specific RHD diagnosis date matches the overall RHD diagnosis date.

**Table S3: Comparison of performance metrics for the ARF benchmark sample, using RHD codes versus final model for case ascertainment**

|  | ARF sample  (n=1789) | |
| --- | --- | --- |
|  | Prediction using RHD codes | Prediction using final model |
| AUC |  | 0.854 |
| Sensitivity | 0.997 | 0.707 |
| Specificity | 0.087 | 0.510 |
| PPV | 0.846 | 0.555 |
| NPV | 0.850 | 0.407 |

Notes: AUC=area under the receiver operating curve, PPV=positive predictive value, NPV=negative predictive value; Non-rheumatic VHD benchmark sample not reported because only four test-negative records available

**Table S4: List of ICD codes used to identify valvular surgeries and procedures**

| **Block number** | **Valvular surgery** | **Valvular procedure** |
| --- | --- | --- |
| 621 | 38456-10 |  |
| 622 | 38475-02  38477-02  38480-00  38481-00  38483-00 | 38270-01 |
| 623 | 38488-00  38488-01  38489-00  38489-01 | 38488-08 |
| 624 | 38456-15  38653-04 |  |
| 625 | 38487-00 |  |
| 626 | 38480-01  38481-01  38485-01 | 38270-02  96222-00 |
| 627 | 38475-00  38477-00 |  |
| 628 | 38488-02  38488-03  38489-02 | 38488-09 |
| 629 | 38485-00 |  |
| 630 | 38456-16  38653-05 |  |
| 631 | 38456-11 |  |
| 632 | 38480-02  38481-02 |  |
| 633 | 38475-01  38477-01 |  |
| 634 | 38488-04  38488-05 | 38488-10 |
| 635 | 38456-17  38653-06 |  |
| 636 | 38456-01 |  |
| 637 | 38488-06  38488-07  38489-04  38489-05 | 38270-03  38488-11 |
| 638 | 38756-18  38653-07 |  |

**Figure S1: Matching hierarchy for Queensland surveillance data**

Decreasing reliability

**Table S5: Comparison of model performance for data before 2012 and from 2013 onwards**

|  | Before 2012 | | After 2013 | |
| --- | --- | --- | --- | --- |
|  | All data | All data - parsimonious | All data | All data - parsimonious |
| AUC | 0.933 | 0.932 | 0.926 | 0.923 |
| Sensitivity | 0.930 | 0.931 | 0.922 | 0.921 |
| Specificity | 0.671 | 0.677 | 0.645 | 0.645 |
| PPV | 0.897 | 0.914 | 0.845 | 0.861 |
| NPV | 0.657 | 0.726 | 0.751 | 0.769 |
